# Supplementary material for: Multiple roles of apolipoprotein B mRNA editing enzyme catalytic subunit 3B (APOBEC3B) in human tumors: a pan-cancer analysis
Source: BMC Bioinformatics. 2022 Aug 2;23:312. doi: 10.1186/s12859-022-04862-0 (PMC9344753; doi:10.1186/s12859-022-04862-0)
Supplement: Supplementary file 1 — Additional file 1. Clinical prognostic significance of DNA methylation of APOBEC3B. [file 12859_2022_4862_MOESM1_ESM.xlsx]

## Sheet: supplementary Table s1
Table S1. Clinical prognostic significance of DNA methylation of APOBEC3B.
Site	Cancer	HR	CI	P.value	LR_test_pvalue	PH_test_Pvalue	Best_split	CHR	MAPINFO	UCSC_RefGene_Name	UCSC_RefGene_Group	Relation_to_UCSC_CpG_Island
cg01089751	LAML	1.179	(0.784;1.774)	0.428557	0.434319	0.224	q75	22	39378425	APOBEC3B	1stExon;5'UTR	Open_Sea
cg06837067	LAML	0.694	(0.445;1.082)	0.107127	0.0959403	0.96	q75	22	39381429	APOBEC3B	Body	Open_Sea
cg14387414	LAML	1.533	(0.978;2.404)	0.0624954	0.0526031	0.919	q25	22	39377930	APOBEC3B	TSS1500	Open_Sea
cg16045423	LAML	0.774	(0.521;1.152)	0.207118	0.215207	0.336	q25	22	39377790	APOBEC3B	TSS1500	Open_Sea
cg21707131	LAML	1.614	(1.028;2.535)	0.0375171	0.0297935	0.321	q25	22	39378283	APOBEC3B	TSS200	Open_Sea
cg26000393	LAML	1.309	(0.874;1.961)	0.191771	0.200765	0.498	q75	22	39378224	APOBEC3B	TSS200	Open_Sea
cg01089751	ACC	2.153	(0.998;4.648)	0.0507286	0.0624769	0.33	q75	22	39378425	APOBEC3B	1stExon;5'UTR	Open_Sea
cg06837067	ACC	2.179	(1.028;4.619)	0.0422635	0.0512946	0.733	q75	22	39381429	APOBEC3B	Body	Open_Sea
cg11816043	ACC	6.139	(1.456;25.878)	0.0134312	0.00136619	0.05	q25	22	39377864	APOBEC3B	TSS1500	Open_Sea
cg14194956	ACC	0.663	(0.294;1.498)	0.323342	0.309777	0.069	mean	22	39378235	APOBEC3B	TSS200	Open_Sea
cg14387414	ACC	1.89	(0.892;4.006)	0.0967695	0.0910251	0.493	median	22	39377930	APOBEC3B	TSS1500	Open_Sea
cg16045423	ACC	2.462	(0.856;7.079)	0.0946498	0.0637564	0.228	q25	22	39377790	APOBEC3B	TSS1500	Open_Sea
cg21707131	ACC	1.307	(0.627;2.725)	0.47501	0.473614	0.258	median	22	39378283	APOBEC3B	TSS200	Open_Sea
cg25787886	ACC	1.252	(0.602;2.606)	0.547006	0.54587	0.063	median	22	39378382	APOBEC3B	TSS200	Open_Sea
cg26000393	ACC	1.557	(0.685;3.538)	0.290642	0.307182	0.652	q75	22	39378224	APOBEC3B	TSS200	Open_Sea
cg01089751	BLCA	1.58	(1.16;2.153)	0.00375414	0.00481316	0.357	mean	22	39378425	APOBEC3B	1stExon;5'UTR	Open_Sea
cg06837067	BLCA	1.924	(1.305;2.836)	0.000956864	0.000412832	0.142	q25	22	39381429	APOBEC3B	Body	Open_Sea
cg14387414	BLCA	0.865	(0.607;1.234)	0.423728	0.417485	0.616	q75	22	39377930	APOBEC3B	TSS1500	Open_Sea
cg01089751	BRCA	0.666	(0.408;1.087)	0.103661	0.0904289	0.206	q75	22	39378425	APOBEC3B	1stExon;5'UTR	Open_Sea
cg06837067	BRCA	0.843	(0.537;1.323)	0.457961	0.451541	0.708	q75	22	39381429	APOBEC3B	Body	Open_Sea
cg14387414	BRCA	0.686	(0.454;1.036)	0.0728365	0.0797095	0.254	q25	22	39377930	APOBEC3B	TSS1500	Open_Sea
cg16045423	BRCA	1.186	(0.743;1.892)	0.475471	0.46916	0.017	q25	22	39377790	APOBEC3B	TSS1500	Open_Sea
cg01089751	CESC	0.709	(0.406;1.238)	0.226738	0.212837	0.364	q75	22	39378425	APOBEC3B	1stExon;5'UTR	Open_Sea
cg06837067	CESC	2.034	(1.24;3.337)	0.00491688	0.0071601	0.486	q75	22	39381429	APOBEC3B	Body	Open_Sea
cg14387414	CESC	1.24	(0.779;1.976)	0.364465	0.363008	0.534	median	22	39377930	APOBEC3B	TSS1500	Open_Sea
cg01089751	COAD	0.727	(0.439;1.202)	0.213521	0.206337	0.234	mean	22	39378425	APOBEC3B	1stExon;5'UTR	Open_Sea
cg06837067	COAD	1.386	(0.861;2.232)	0.178759	0.176633	0.625	median	22	39381429	APOBEC3B	Body	Open_Sea
cg14387414	COAD	1.16	(0.663;2.03)	0.60302	0.598296	0.023	q25	22	39377930	APOBEC3B	TSS1500	Open_Sea
cg16045423	COAD	0.766	(0.461;1.272)	0.303334	0.311598	0.351	q25	22	39377790	APOBEC3B	TSS1500	Open_Sea
cg01089751	ESCA	0.896	(0.552;1.454)	0.65549	0.657743	0.464	q25	22	39378425	APOBEC3B	1stExon;5'UTR	Open_Sea
cg06837067	ESCA	0.643	(0.4;1.034)	0.0685315	0.0760021	0.313	q25	22	39381429	APOBEC3B	Body	Open_Sea
cg14387414	ESCA	1.607	(0.913;2.829)	0.100112	0.0852142	0.545	q25	22	39377930	APOBEC3B	TSS1500	Open_Sea
cg16045423	ESCA	1.616	(1.022;2.557)	0.0401724	0.037635	0.954	median	22	39377790	APOBEC3B	TSS1500	Open_Sea
cg01089751	GBM	1.115	(0.741;1.677)	0.60241	0.602149	0.687257	median	22	39378425	APOBEC3B	1stExon;5'UTR	Open_Sea
cg06837067	GBM	0.886	(0.589;1.333)	0.561645	0.561512	0.738873	median	22	39381429	APOBEC3B	Body	Open_Sea
cg11816043	GBM	1.372	(0.849;2.218)	0.19664	0.185099	0.0478734	q25	22	39377864	APOBEC3B	TSS1500	Open_Sea
cg14194956	GBM	0.809	(0.518;1.265)	0.353474	0.360454	0.391244	q25	22	39378235	APOBEC3B	TSS200	Open_Sea
cg14387414	GBM	0.757	(0.474;1.211)	0.245911	0.256352	0.338487	q25	22	39377930	APOBEC3B	TSS1500	Open_Sea
cg16045423	GBM	1.415	(0.93;2.153)	0.104898	0.109593	0.41256	mean	22	39377790	APOBEC3B	TSS1500	Open_Sea
cg21707131	GBM	1.451	(0.901;2.334)	0.125468	0.114852	0.906764	q25	22	39378283	APOBEC3B	TSS200	Open_Sea
cg25787886	GBM	0.623	(0.397;0.977)	0.039428	0.0467382	0.197654	q25	22	39378382	APOBEC3B	TSS200	Open_Sea
cg26000393	GBM	1.242	(0.825;1.868)	0.299217	0.298771	0.10597	median	22	39378224	APOBEC3B	TSS200	Open_Sea
cg01089751	HNSC	0.822	(0.631;1.072)	0.147986	0.148149	0.696897	median	22	39378425	APOBEC3B	1stExon;5'UTR	Open_Sea
cg06837067	HNSC	1.556	(1.107;2.186)	0.0109133	0.00782051	0.147342	q25	22	39381429	APOBEC3B	Body	Open_Sea
cg14387414	HNSC	0.818	(0.628;1.066)	0.136735	0.136461	0.520047	mean	22	39377930	APOBEC3B	TSS1500	Open_Sea
cg01089751	KICH	0.394	(0.105;1.477)	0.167215	0.181329	0.430344	q25	22	39378425	APOBEC3B	1stExon;5'UTR	Open_Sea
cg06837067	KICH	0.525	(0.131;2.103)	0.36317	0.349717	0.449458	median	22	39381429	APOBEC3B	Body	Open_Sea
cg11816043	KICH	4.114	(0.854;19.83)	0.0779463	0.0512283	0.0713593	median	22	39377864	APOBEC3B	TSS1500	Open_Sea
cg14194956	KICH	3.223	(0.403;25.796)	0.270105	0.201723	0.100931	q25	22	39378235	APOBEC3B	TSS200	Open_Sea
cg14387414	KICH	0.327	(0.041;2.616)	0.292159	0.225424	0.623976	q75	22	39377930	APOBEC3B	TSS1500	Open_Sea
cg16045423	KICH	4.29	(0.888;20.72)	0.0698884	0.0447034	0.084306	median	22	39377790	APOBEC3B	TSS1500	Open_Sea
cg21707131	KICH	3.106	(0.388;24.838)	0.285311	0.217963	0.396891	q25	22	39378283	APOBEC3B	TSS200	Open_Sea
cg26000393	KICH	0.299	(0.037;2.396)	0.25561	0.186408	0.34946	q75	22	39378224	APOBEC3B	TSS200	Open_Sea
cg01089751	KIRC	0.678	(0.454;1.013)	0.0577325	0.0541097	0.269941	mean	22	39378425	APOBEC3B	1stExon;5'UTR	Open_Sea
cg06837067	KIRC	2.353	(1.355;4.088)	0.00238135	0.000838693	0.994105	q25	22	39381429	APOBEC3B	Body	Open_Sea
cg14387414	KIRC	0.61	(0.413;0.902)	0.0132823	0.0122632	0.711472	mean	22	39377930	APOBEC3B	TSS1500	Open_Sea
cg16045423	KIRC	0.63	(0.421;0.943)	0.0247648	0.0219815	0.896039	mean	22	39377790	APOBEC3B	TSS1500	Open_Sea
cg21707131	KIRC	1.382	(0.938;2.037)	0.101889	0.0996423	0.123125	median	22	39378283	APOBEC3B	TSS200	Open_Sea
cg26000393	KIRC	0.382	(0.22;0.663)	0.000621729	0.000143448	0.554634	q75	22	39378224	APOBEC3B	TSS200	Open_Sea
cg01089751	KIRP	1.61	(0.854;3.034)	0.141009	0.136586	0.816193	median	22	39378425	APOBEC3B	1stExon;5'UTR	Open_Sea
cg06837067	KIRP	2.258	(1.205;4.23)	0.0110136	0.0138466	0.572173	q75	22	39381429	APOBEC3B	Body	Open_Sea
cg14194956	KIRP	1.483	(0.683;3.221)	0.318899	0.300627	0.484678	q25	22	39378235	APOBEC3B	TSS200	Open_Sea
cg14387414	KIRP	1.432	(0.747;2.746)	0.279115	0.288743	0.273692	q75	22	39377930	APOBEC3B	TSS1500	Open_Sea
cg16045423	KIRP	3.015	(1.599;5.685)	0.000650864	0.0011258	0.165547	q75	22	39377790	APOBEC3B	TSS1500	Open_Sea
cg26000393	KIRP	1.59	(0.82;3.086)	0.169967	0.182988	0.564136	q75	22	39378224	APOBEC3B	TSS200	Open_Sea
cg01089751	LGG	0.222	(0.149;0.331)	1.4e-13	1.89e-15	0	mean	22	39378425	APOBEC3B	1stExon;5'UTR	Open_Sea
cg06837067	LGG	0.343	(0.235;0.5)	2.79e-08	7.65e-09	0.065	median	22	39381429	APOBEC3B	Body	Open_Sea
cg14387414	LGG	0.298	(0.204;0.437)	5.49e-10	8.75e-11	0	median	22	39377930	APOBEC3B	TSS1500	Open_Sea
cg01089751	LIHC	1.396	(0.984;1.98)	0.061624	0.0591888	0.062	median	22	39378425	APOBEC3B	1stExon;5'UTR	Open_Sea
cg06837067	LIHC	0.898	(0.635;1.269)	0.541693	0.541657	0.689	mean	22	39381429	APOBEC3B	Body	Open_Sea
cg14387414	LIHC	0.908	(0.643;1.281)	0.581153	0.581252	0.606	median	22	39377930	APOBEC3B	TSS1500	Open_Sea
cg16045423	LIHC	0.831	(0.589;1.172)	0.290607	0.290004	0.283	mean	22	39377790	APOBEC3B	TSS1500	Open_Sea
cg01089751	LUAD	1.197	(0.872;1.642)	0.264985	0.266738	0.470127	mean	22	39378425	APOBEC3B	1stExon;5'UTR	Open_Sea
cg06837067	LUAD	1.295	(0.88;1.904)	0.189489	0.179007	0.0115697	q25	22	39381429	APOBEC3B	Body	Open_Sea
cg14387414	LUAD	1.324	(0.915;1.917)	0.136653	0.127551	0.895022	q25	22	39377930	APOBEC3B	TSS1500	Open_Sea
cg16045423	LUAD	1.299	(0.949;1.779)	0.102654	0.102261	0.710127	mean	22	39377790	APOBEC3B	TSS1500	Open_Sea
cg21707131	LUAD	0.835	(0.592;1.178)	0.304056	0.310237	0.302688	q25	22	39378283	APOBEC3B	TSS200	Open_Sea
cg26000393	LUAD	1.214	(0.883;1.671)	0.23293	0.235737	0.25208	mean	22	39378224	APOBEC3B	TSS200	Open_Sea
cg01089751	LUSC	0.882	(0.613;1.267)	0.495752	0.500106	0.05	q25	22	39378425	APOBEC3B	1stExon;5'UTR	Open_Sea
cg06837067	LUSC	1.19	(0.843;1.681)	0.321941	0.327848	0.765	q75	22	39381429	APOBEC3B	Body	Open_Sea
cg14387414	LUSC	1.209	(0.818;1.786)	0.341673	0.333	0.969	q25	22	39377930	APOBEC3B	TSS1500	Open_Sea
cg21707131	LUSC	1.361	(0.921;2.011)	0.121924	0.111442	0.319	q25	22	39378283	APOBEC3B	TSS200	Open_Sea
cg26000393	LUSC	1.315	(0.956;1.809)	0.0925888	0.0915199	0.704	median	22	39378224	APOBEC3B	TSS200	Open_Sea
cg01089751	MESO	1.449	(0.806;2.604)	0.214971	0.198746	0.907	q25	22	39378425	APOBEC3B	1stExon;5'UTR	Open_Sea
cg06837067	MESO	0.564	(0.322;0.988)	0.0451889	0.035652	0.91	q75	22	39381429	APOBEC3B	Body	Open_Sea
cg11816043	MESO	1.496	(0.88;2.542)	0.136854	0.149485	0.307	q75	22	39377864	APOBEC3B	TSS1500	Open_Sea
cg14194956	MESO	0.701	(0.413;1.189)	0.187555	0.200384	0.445	q25	22	39378235	APOBEC3B	TSS200	Open_Sea
cg14387414	MESO	1.772	(1.059;2.965)	0.0293862	0.0365634	0.862	q75	22	39377930	APOBEC3B	TSS1500	Open_Sea
cg16045423	MESO	1.153	(0.675;1.971)	0.602183	0.598047	0.958	q25	22	39377790	APOBEC3B	TSS1500	Open_Sea
cg21707131	MESO	0.623	(0.361;1.075)	0.0888632	0.0770853	0.102	q75	22	39378283	APOBEC3B	TSS200	Open_Sea
cg25787886	MESO	0.734	(0.443;1.215)	0.229123	0.220845	0.509	mean	22	39378382	APOBEC3B	TSS200	Open_Sea
cg26000393	MESO	1.27	(0.796;2.028)	0.315502	0.31755	0.767	mean	22	39378224	APOBEC3B	TSS200	Open_Sea
cg01089751	PAAD	0.573	(0.339;0.968)	0.0374375	0.027566	0.44308	q75	22	39378425	APOBEC3B	1stExon;5'UTR	Open_Sea
cg06837067	PAAD	0.774	(0.493;1.217)	0.266897	0.276461	0.410545	q25	22	39381429	APOBEC3B	Body	Open_Sea
cg14387414	PAAD	0.586	(0.36;0.954)	0.0315947	0.0243674	0.784294	q75	22	39377930	APOBEC3B	TSS1500	Open_Sea
cg01089751	READ	1.43	(0.406;5.03)	0.577555	0.563757	0.308	q25	22	39378425	APOBEC3B	1stExon;5'UTR	Open_Sea
cg06837067	READ	1.649	(0.627;4.336)	0.31083	0.306195	0.454	median	22	39381429	APOBEC3B	Body	Open_Sea
cg11816043	READ	0.667	(0.246;1.807)	0.425433	0.435778	0.137	q25	22	39377864	APOBEC3B	TSS1500	Open_Sea
cg14194956	READ	0.49	(0.185;1.299)	0.151296	0.163256	0.327	q25	22	39378235	APOBEC3B	TSS200	Open_Sea
cg14387414	READ	0.399	(0.129;1.235)	0.110945	0.0881312	0.683	mean	22	39377930	APOBEC3B	TSS1500	Open_Sea
cg16045423	READ	0.627	(0.237;1.659)	0.347443	0.355843	0.641	q25	22	39377790	APOBEC3B	TSS1500	Open_Sea
cg25787886	READ	1.798	(0.674;4.801)	0.241495	0.241013	0.341	median	22	39378382	APOBEC3B	TSS200	Open_Sea
cg26000393	READ	0.265	(0.101;0.694)	0.00688314	0.00806392	0.69	q25	22	39378224	APOBEC3B	TSS200	Open_Sea
cg01089751	SARC	0.878	(0.592;1.303)	0.519109	0.519162	0.658	median	22	39378425	APOBEC3B	1stExon;5'UTR	Open_Sea
cg06837067	SARC	0.701	(0.452;1.087)	0.112888	0.122818	0.144	q25	22	39381429	APOBEC3B	Body	Open_Sea
cg14387414	SARC	1.62	(1.088;2.412)	0.0175498	0.0169115	0.097	median	22	39377930	APOBEC3B	TSS1500	Open_Sea
cg16045423	SARC	0.925	(0.594;1.442)	0.731933	0.73345	0.555	q25	22	39377790	APOBEC3B	TSS1500	Open_Sea
cg01089751	SKCM	0.881	(0.638;1.217)	0.441577	0.447103	0.081	q25	22	39378425	APOBEC3B	1stExon;5'UTR	Open_Sea
cg06837067	SKCM	1.735	(1.231;2.446)	0.00166668	0.000893424	0.857	q25	22	39381429	APOBEC3B	Body	Open_Sea
cg14387414	SKCM	1.332	(0.98;1.81)	0.0668182	0.0733021	0.222	q75	22	39377930	APOBEC3B	TSS1500	Open_Sea
cg16045423	SKCM	0.833	(0.635;1.092)	0.186393	0.183597	0.968	mean	22	39377790	APOBEC3B	TSS1500	Open_Sea
cg26000393	SKCM	1.37	(0.984;1.906)	0.0620462	0.0543793	0.971	q25	22	39378224	APOBEC3B	TSS200	Open_Sea
cg01089751	STAD	1.328	(0.884;1.994)	0.172026	0.160293	0.626	q25	22	39378425	APOBEC3B	1stExon;5'UTR	Open_Sea
cg06837067	STAD	1.526	(1.082;2.151)	0.0160348	0.0191727	0.733	q75	22	39381429	APOBEC3B	Body	Open_Sea
cg14387414	STAD	1.135	(0.818;1.575)	0.448765	0.450616	0.628	mean	22	39377930	APOBEC3B	TSS1500	Open_Sea
cg16045423	STAD	0.884	(0.64;1.22)	0.452411	0.451691	0.443	mean	22	39377790	APOBEC3B	TSS1500	Open_Sea
cg21707131	STAD	1.084	(0.774;1.518)	0.639349	0.640645	0.676	mean	22	39378283	APOBEC3B	TSS200	Open_Sea
cg01089751	UCEC	3.487	(1.727;7.038)	0.000491647	5.62e-05	0.619319	q25	22	39378425	APOBEC3B	1stExon;5'UTR	Open_Sea
cg06837067	UCEC	1.144	(0.722;1.812)	0.566405	0.566662	0.0666572	mean	22	39381429	APOBEC3B	Body	Open_Sea
cg14387414	UCEC	0.965	(0.56;1.663)	0.898652	0.898338	0.974185	q75	22	39377930	APOBEC3B	TSS1500	Open_Sea
cg16045423	UCEC	0.559	(0.344;0.907)	0.0185658	0.0158915	0.619661	mean	22	39377790	APOBEC3B	TSS1500	Open_Sea
cg01089751	UCS	0.578	(0.256;1.306)	0.187636	0.207636	0.569252	q25	22	39378425	APOBEC3B	1stExon;5'UTR	Open_Sea
cg06837067	UCS	0.536	(0.271;1.06)	0.072955	0.0693281	0.317645	mean	22	39381429	APOBEC3B	Body	Open_Sea
cg14194956	UCS	0.512	(0.222;1.179)	0.115744	0.0946797	0.803767	mean	22	39378235	APOBEC3B	TSS200	Open_Sea
cg14387414	UCS	0.573	(0.283;1.158)	0.120923	0.133613	0.988832	q25	22	39377930	APOBEC3B	TSS1500	Open_Sea
cg16045423	UCS	0.64	(0.303;1.354)	0.242989	0.257586	0.796095	q25	22	39377790	APOBEC3B	TSS1500	Open_Sea
cg21707131	UCS	0.84	(0.377;1.872)	0.670524	0.666101	0.484124	mean	22	39378283	APOBEC3B	TSS200	Open_Sea
cg25787886	UCS	0.785	(0.34;1.811)	0.570182	0.56145	0.267684	mean	22	39378382	APOBEC3B	TSS200	Open_Sea
cg26000393	UCS	0.675	(0.326;1.395)	0.288598	0.300261	0.290462	q25	22	39378224	APOBEC3B	TSS200	Open_Sea
cg01089751	UVM	3.073	(0.902;10.471)	0.0727474	0.0416587	0.067	q25	22	39378425	APOBEC3B	1stExon;5'UTR	Open_Sea
cg06837067	UVM	0.229	(0.054;0.979)	0.0467167	0.0152789	0.002	q75	22	39381429	APOBEC3B	Body	Open_Sea
cg11816043	UVM	0	(0;Inf)	0.997251	4.28e-05	1	q75	22	39377864	APOBEC3B	TSS1500	Open_Sea
cg14194956	UVM	1.705	(0.735;3.952)	0.21367	0.207564	0.476	mean	22	39378235	APOBEC3B	TSS200	Open_Sea
cg14387414	UVM	0	(0;Inf)	0.997441	0.000221834	1	q75	22	39377930	APOBEC3B	TSS1500	Open_Sea
cg16045423	UVM	0.64	(0.217;1.885)	0.418271	0.396396	0.369	q75	22	39377790	APOBEC3B	TSS1500	Open_Sea
cg21707131	UVM	1.372	(0.603;3.122)	0.451393	0.451309	0.549	median	22	39378283	APOBEC3B	TSS200	Open_Sea
cg25787886	UVM	1.817	(0.78;4.232)	0.166437	0.177922	0.073	mean	22	39378382	APOBEC3B	TSS200	Open_Sea
cg26000393	UVM	2.198	(0.946;5.107)	0.0672637	0.0780757	0.514	q75	22	39378224	APOBEC3B	TSS200	Open_Sea
